# Supplementary material for: Brigatinib combined with anti-EGFR antibody overcomes osimertinib resistance in EGFR-mutated non-small-cell lung cancer
Source: PubMed Central journal article supplement (PMC5355811; doi:10.1038/ncomms14768), 2017-03-13
Supplement: ncomms14768-s3.pdf [file ncomms14768-s3.pdf]

**Editorial Note:** this manuscript has been previously reviewed at another journal that is not operating a transparent peer review scheme. This document only contains reviewer comments and rebuttal letters for versions considered at Nature Communications.

REVIEWERS' COMMENTS:

Reviewer #2 (Remarks to the Author):

The authors have addressed all of my comments.

REVIEWERS' COMMENTS:

Reviewer #2 (Remarks to the Author):

The authors have addressed all of my comments.

Answer ==> Thank you very much for reviewing our manuscript and thank you so much for your kind decision
